# Supplementary material
Source: PubMed Central journal article supplement (PMC7903227)

**Supplemental Figure 1: Suppression of NK function by IFN $\gamma$  upregulation of PD-L1 on THP-1 targets is overcome by PD-1 blockade but not PD-L1 blockade. THP-1 were left untreated or stimulated with 500 U/mL IFN $\gamma$  overnight and stained for PD-L1 (A). Stimulated THP-1 were co-cultured with purified NK cells with or without PD-1 blockade or an irrelevant scFv four 4hr and stained for CD107a (B) or IFN $\gamma$  (C). NK cells were also cultured with K562 and THP-1 cells with PD-L1 blockade and evaluated for CD107a (D) and IFN $\gamma$  (E).**

### Supplemental Figure 1

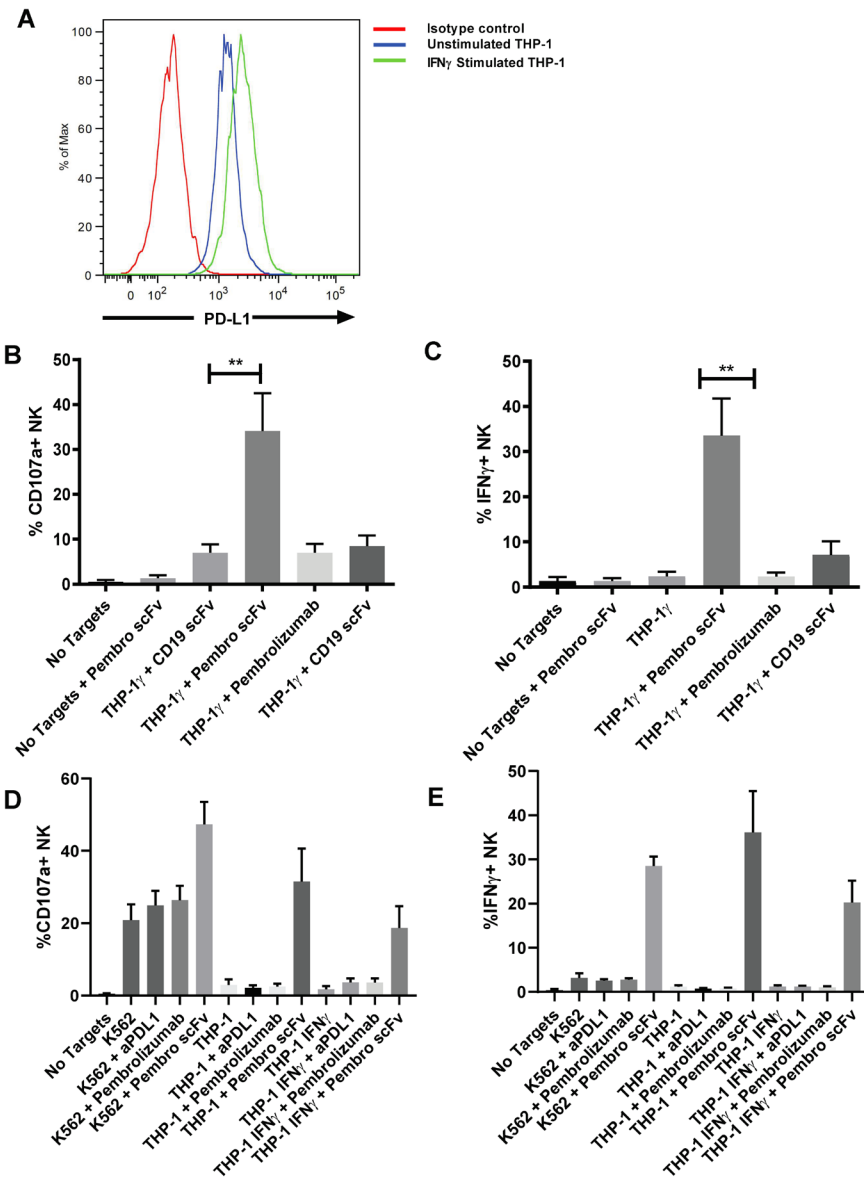

**Supplemental Figure 2: PD-1 blockade with Pembro-scFv results in an increase of pAKT in NK cells co-cultured with PD-L1 expressing targets and similar functional enhancements are seen with a similar PD-1 scFv as well as against stimulated CD8+ T-cells.** NK cells with or without PD-1 blockade were co-cultured with THP-1 cells for up to 60 minutes **(A)**. At the end of each time point, cells were stained for NK cell markers and intracellular pAKT (n=3). PD-1 blockade was also evaluated with a scFv based on the clinical anti-PD-1, Tislelizumab, in comparison to Pembro-scFv with similar functional increases seen in CD107a **(B)** and IFN $\gamma$  **(C)**. Purified T-cells were stimulated with pooled peptide (CEF) and IL-2 for 7 days and with and without PD-1 blockade and assessed for CD107a **(D)** and IFN $\gamma$  **(E)** (n=7).; \* p<0.05 \*\* p<0.01 \*\*\* p<0.001.

**Supplemental Figure 2**

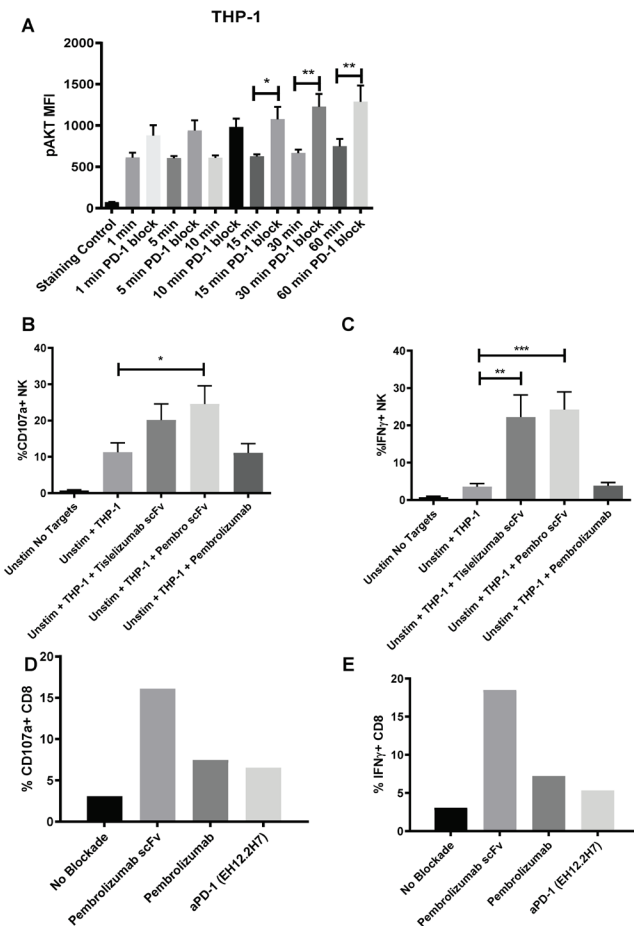

**Supplemental Figure 3: Digestion and Fc deglycosylation have no effect on pembrolizumab blockade of NK expressed PD-1.** pembrolizumab was treated with EndoS to deglycosylate the Fc or digested with papain to generate Fab fragments. Digestion of pembrolizumab was confirmed by western blot (A). Antibody preparations were tested for antagonistic function against K562 (B-D) or THP-1 (C-E).

**Supplemental Figure 3**

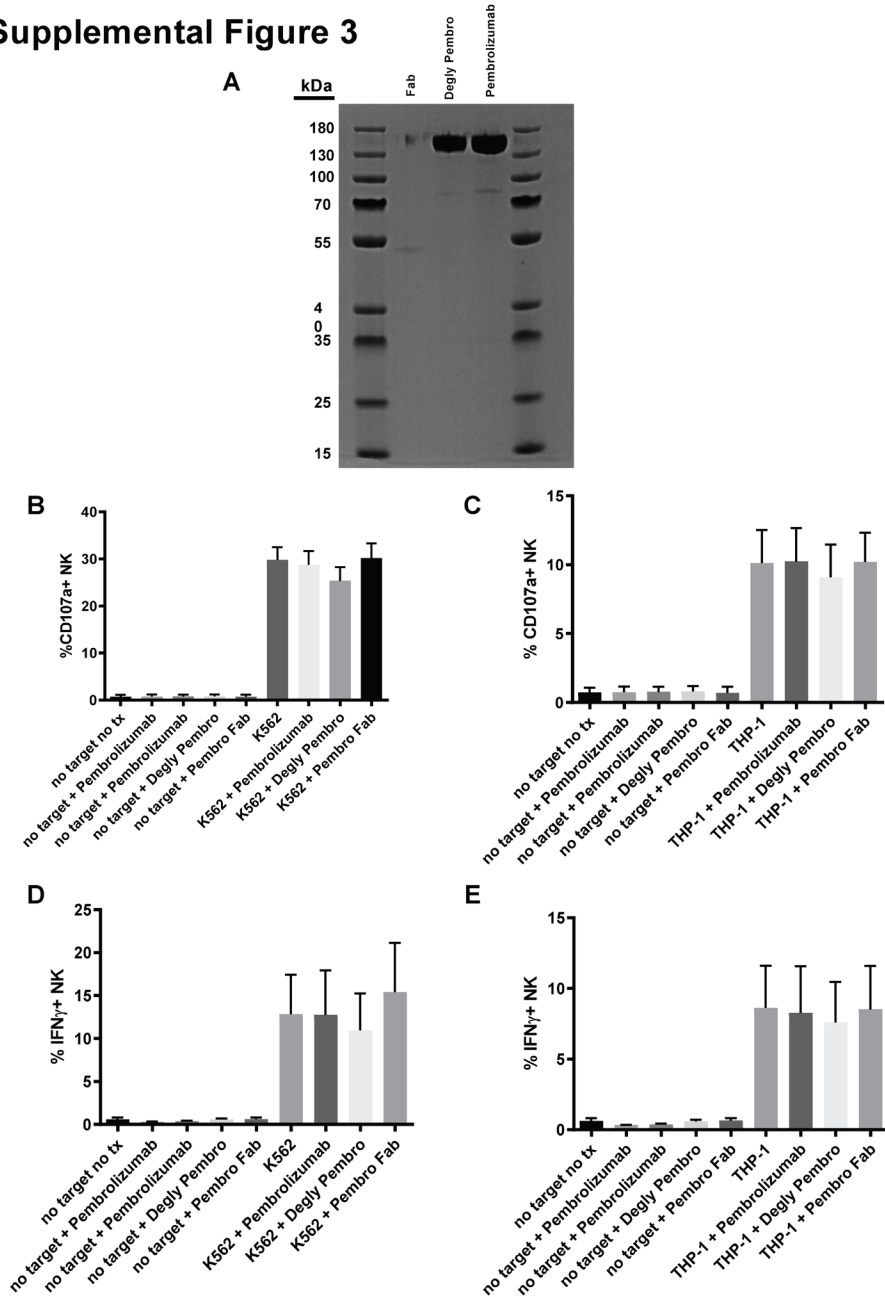

Supplement: advancesADV2019001110-suppl1.pdf [file advancesADV2019001110-suppl1.pdf]
